# Supplementary figures and images for: NAD+ enhances ribitol and ribose rescue of α-dystroglycan functional glycosylation in human FKRP-mutant myotubes
Source: eLife journal article supplement (doi:10.7554/elife.65443), 2021-01-29

Figure 1-figure supplement 1

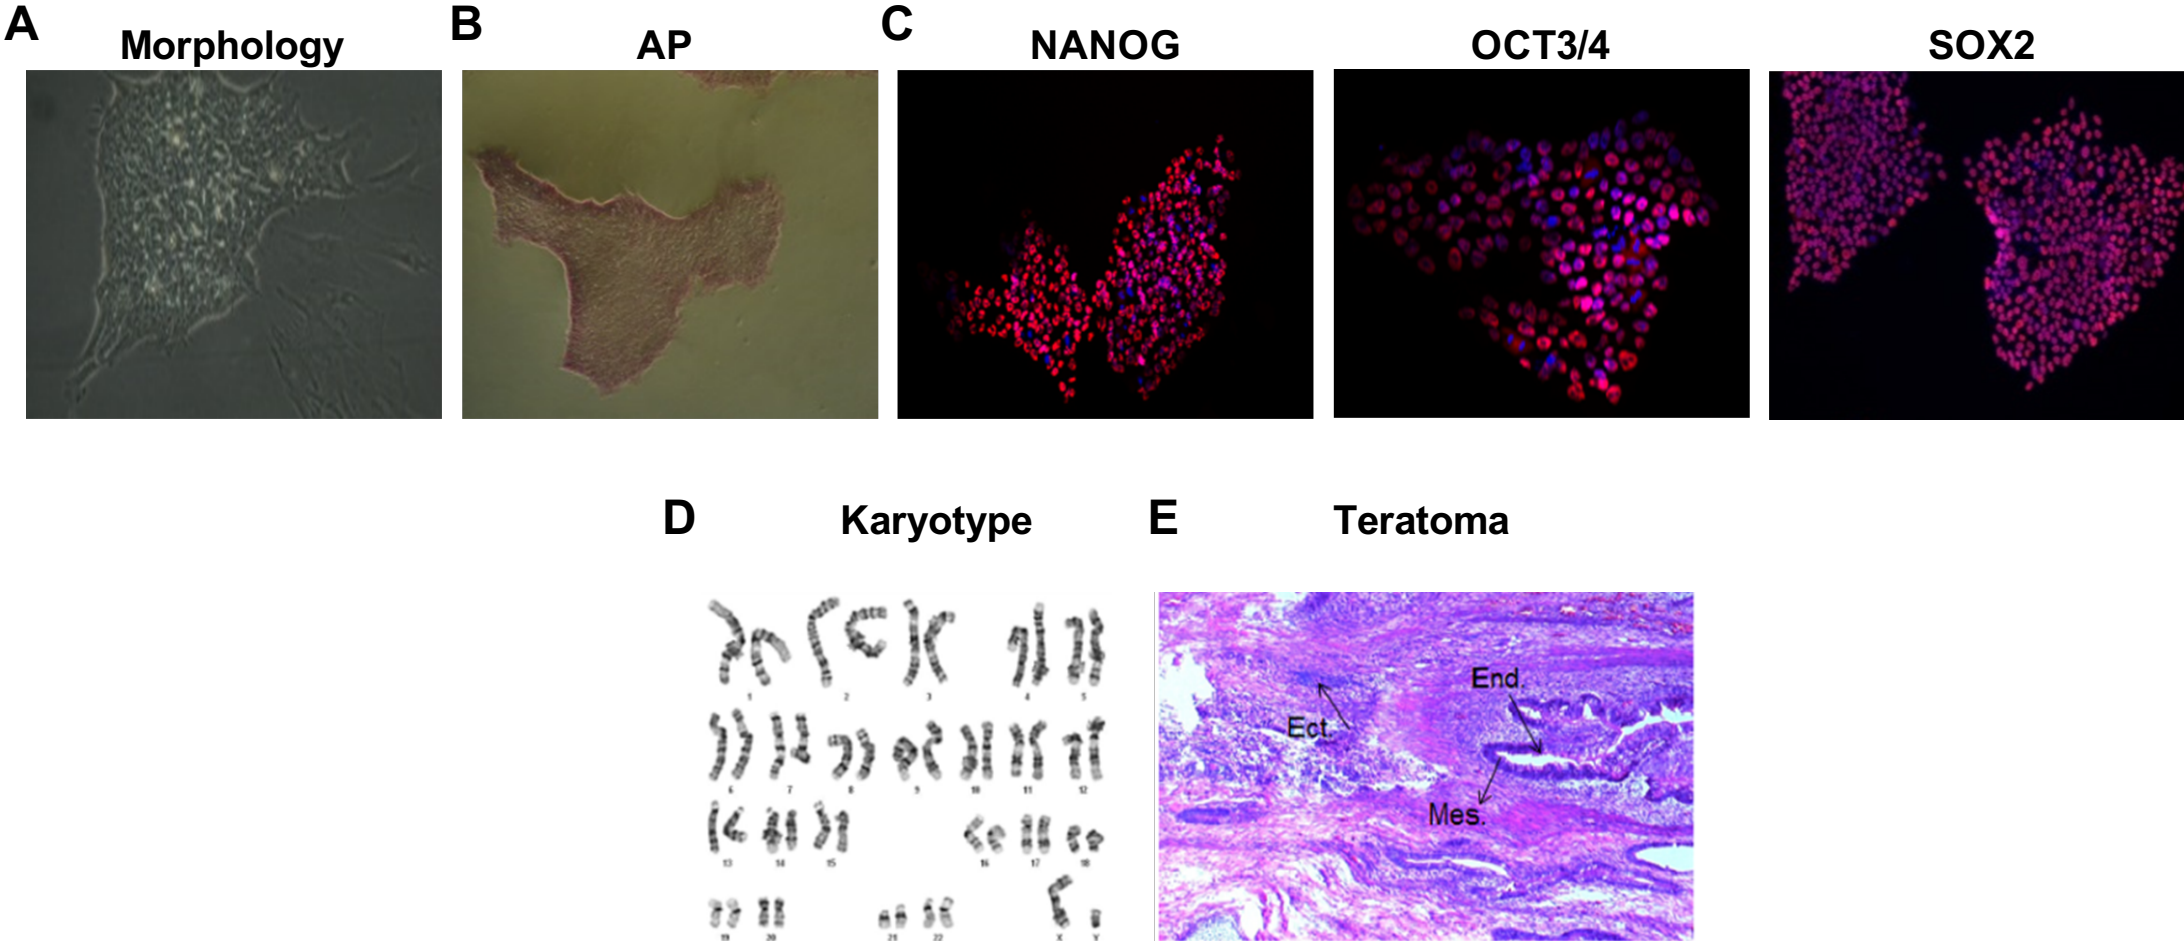

Supplement: supp [file elife_poa_e65443_Figure_1_figure_supplement_1.pdf › elife_poa_e65443_Figure_1_figure_supplement_1.pdf]

Figure 1-figure supplement 2

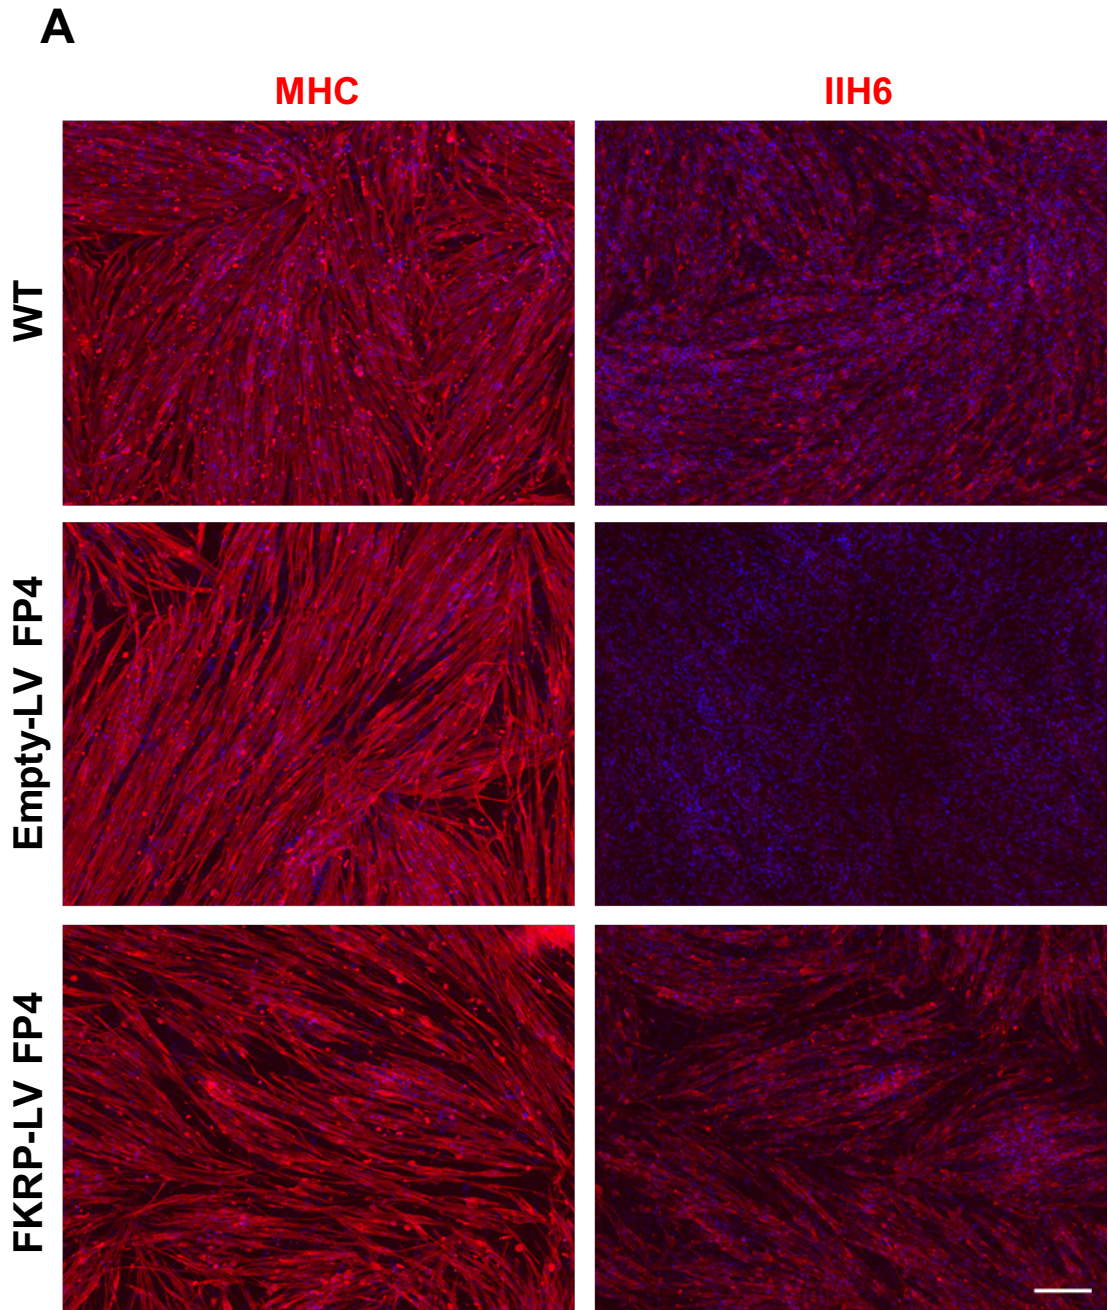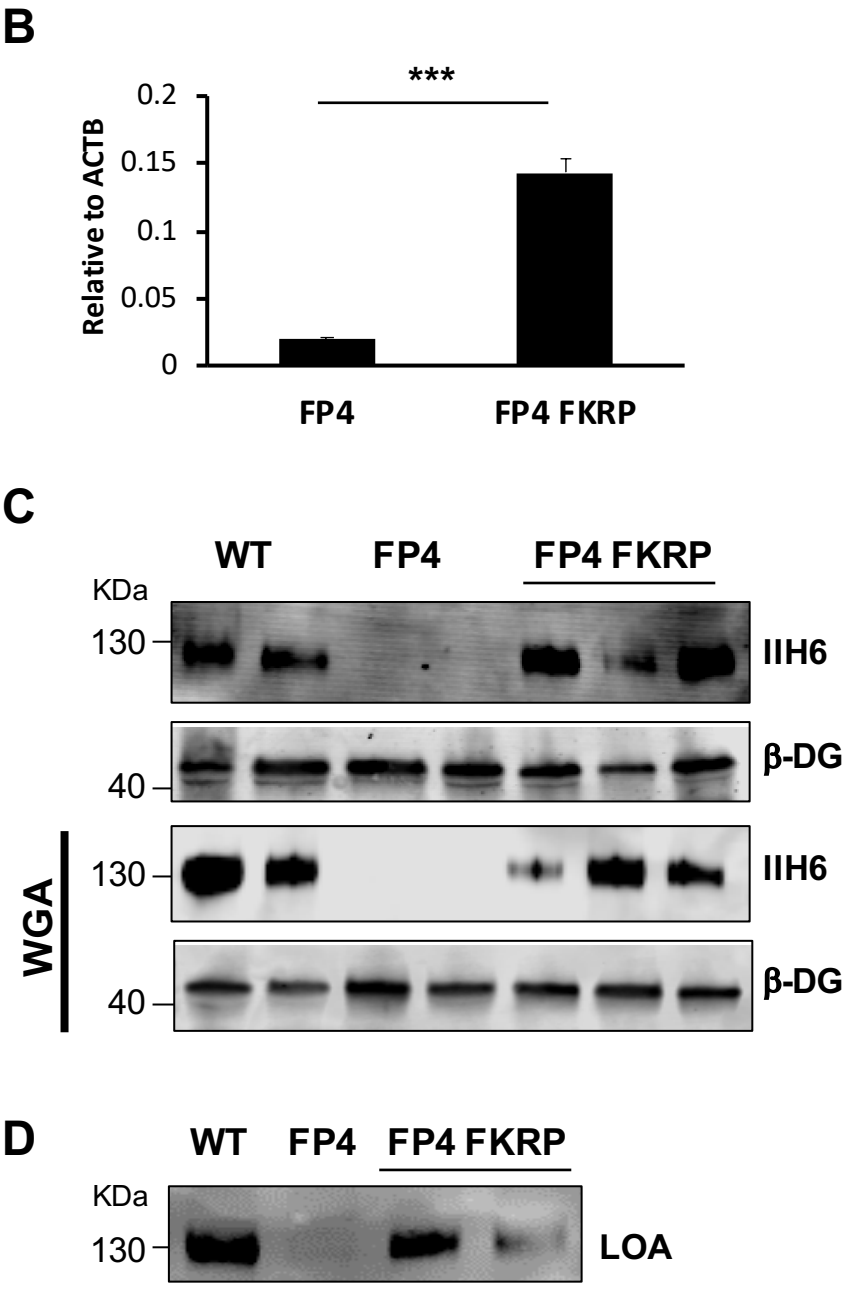

Supplement: supp [file elife_poa_e65443_Figure_1_figure_supplement_2.pdf › elife_poa_e65443_Figure_1_figure_supplement_2.pdf]

Figure 2-figure supplement 1

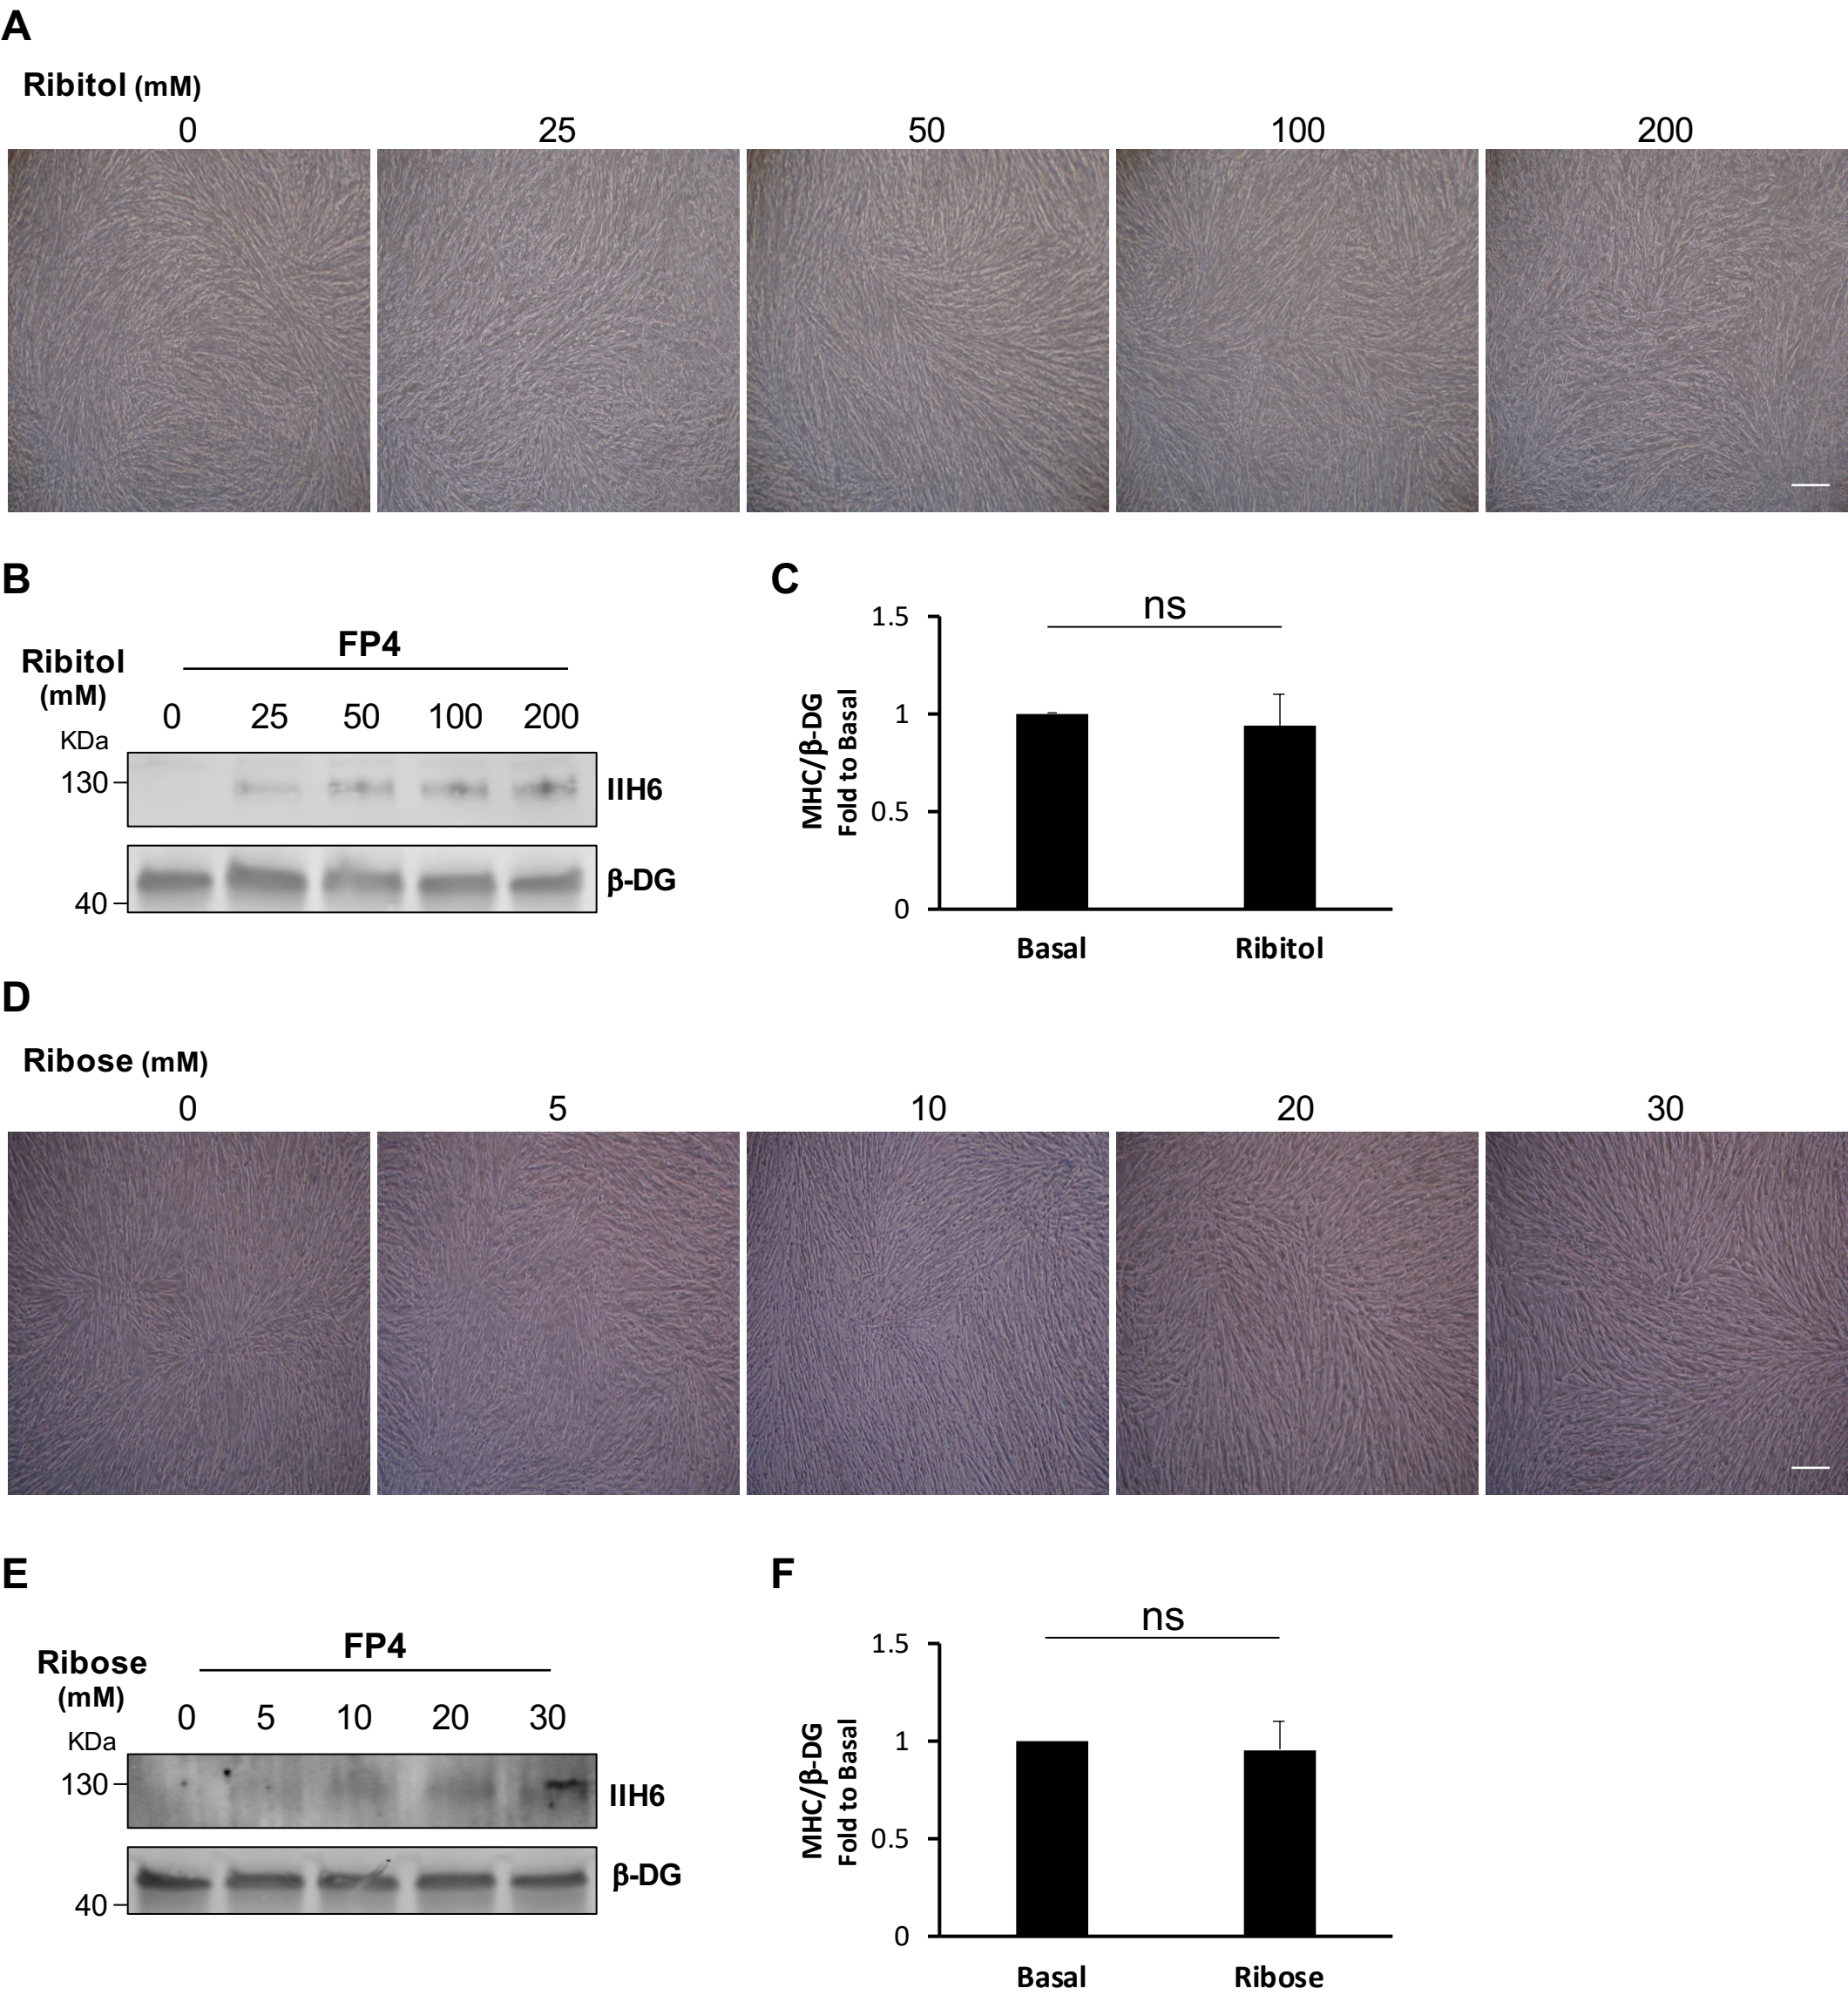

Supplement: supp [file elife_poa_e65443_Figure_2_figure_supplement_1.pdf › elife_poa_e65443_Figure_2_figure_supplement_1.pdf]

Figure 3-figure supplement 1

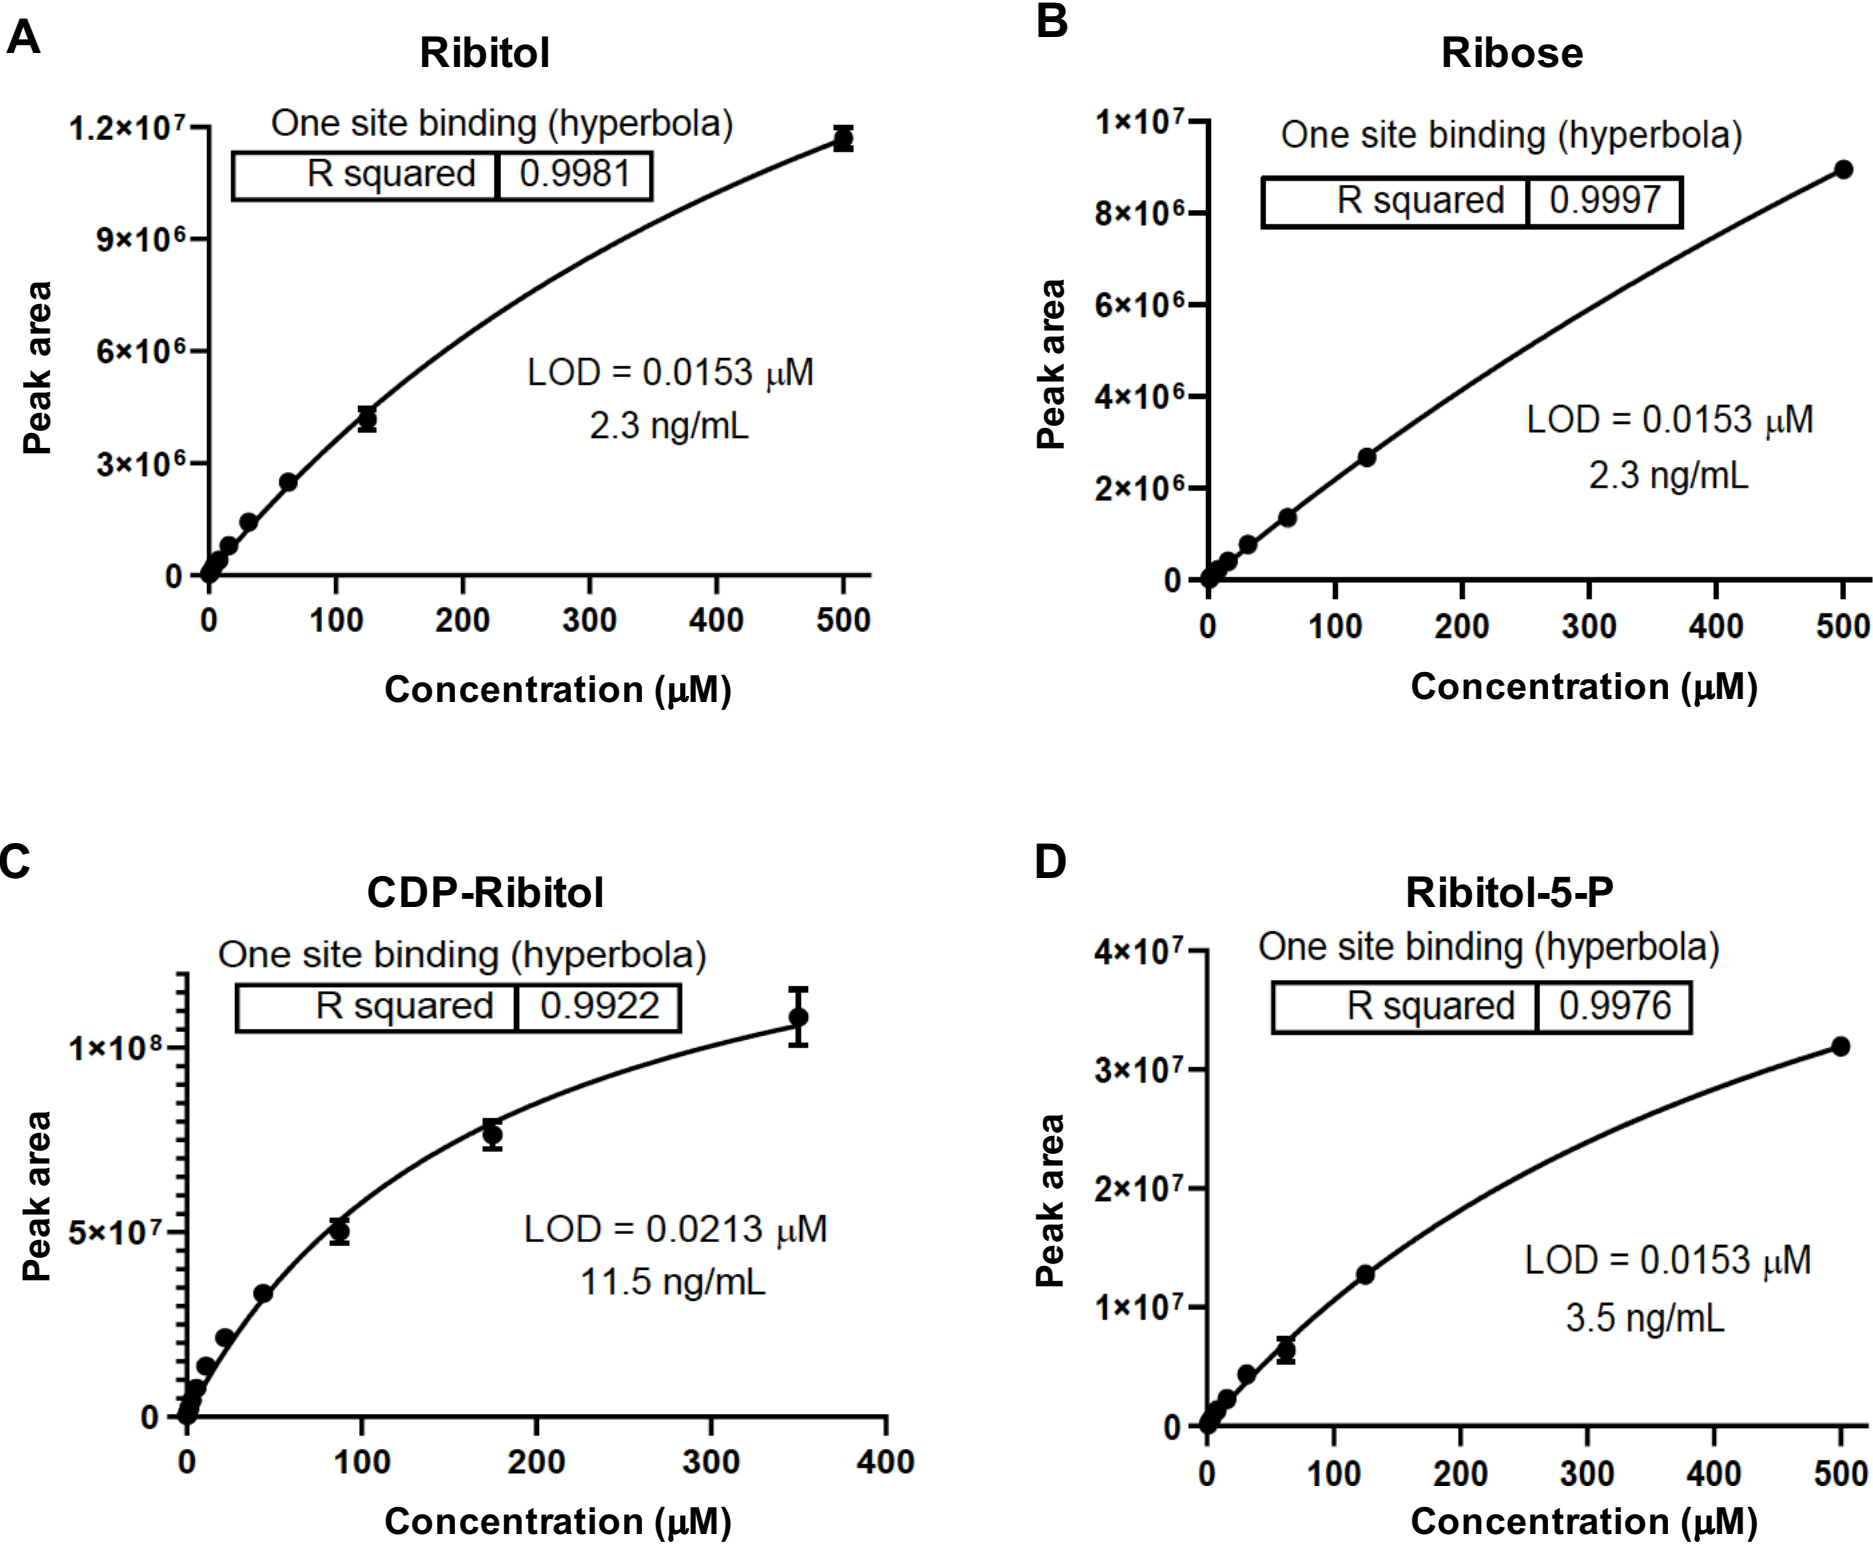

Supplement: supp [file elife_poa_e65443_Figure_3_figure_supplement_1.pdf › elife_poa_e65443_Figure_3_figure_supplement_1.pdf]

**Figure 4-figure supplement 1**

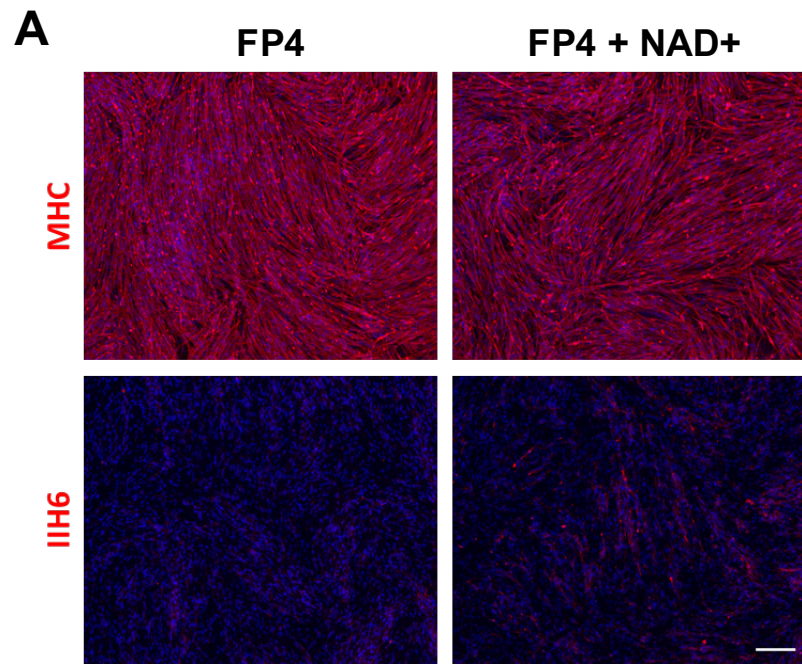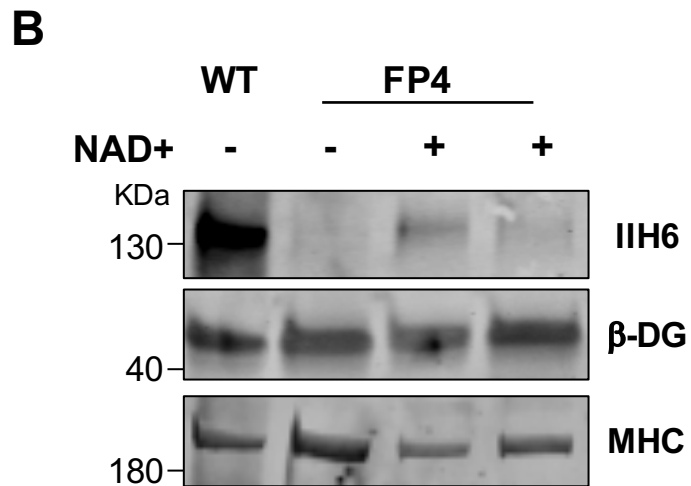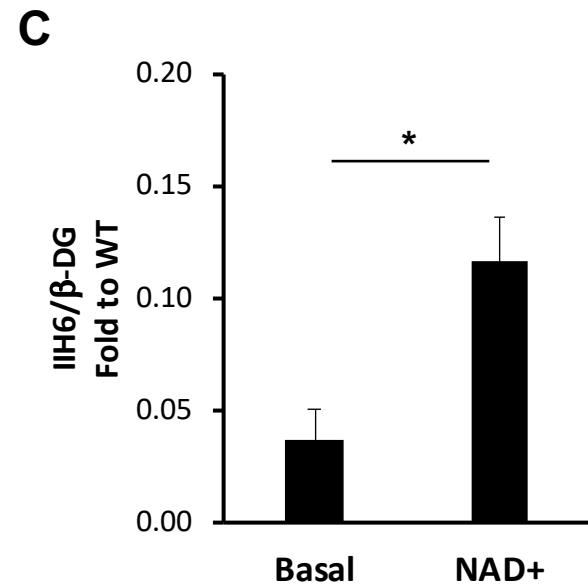

Supplement: supp [file elife_poa_e65443_Figure_4_figure_supplement_1.pdf › elife_poa_e65443_Figure_4_figure_supplement_1.pdf]

Figure 4-figure supplement 2

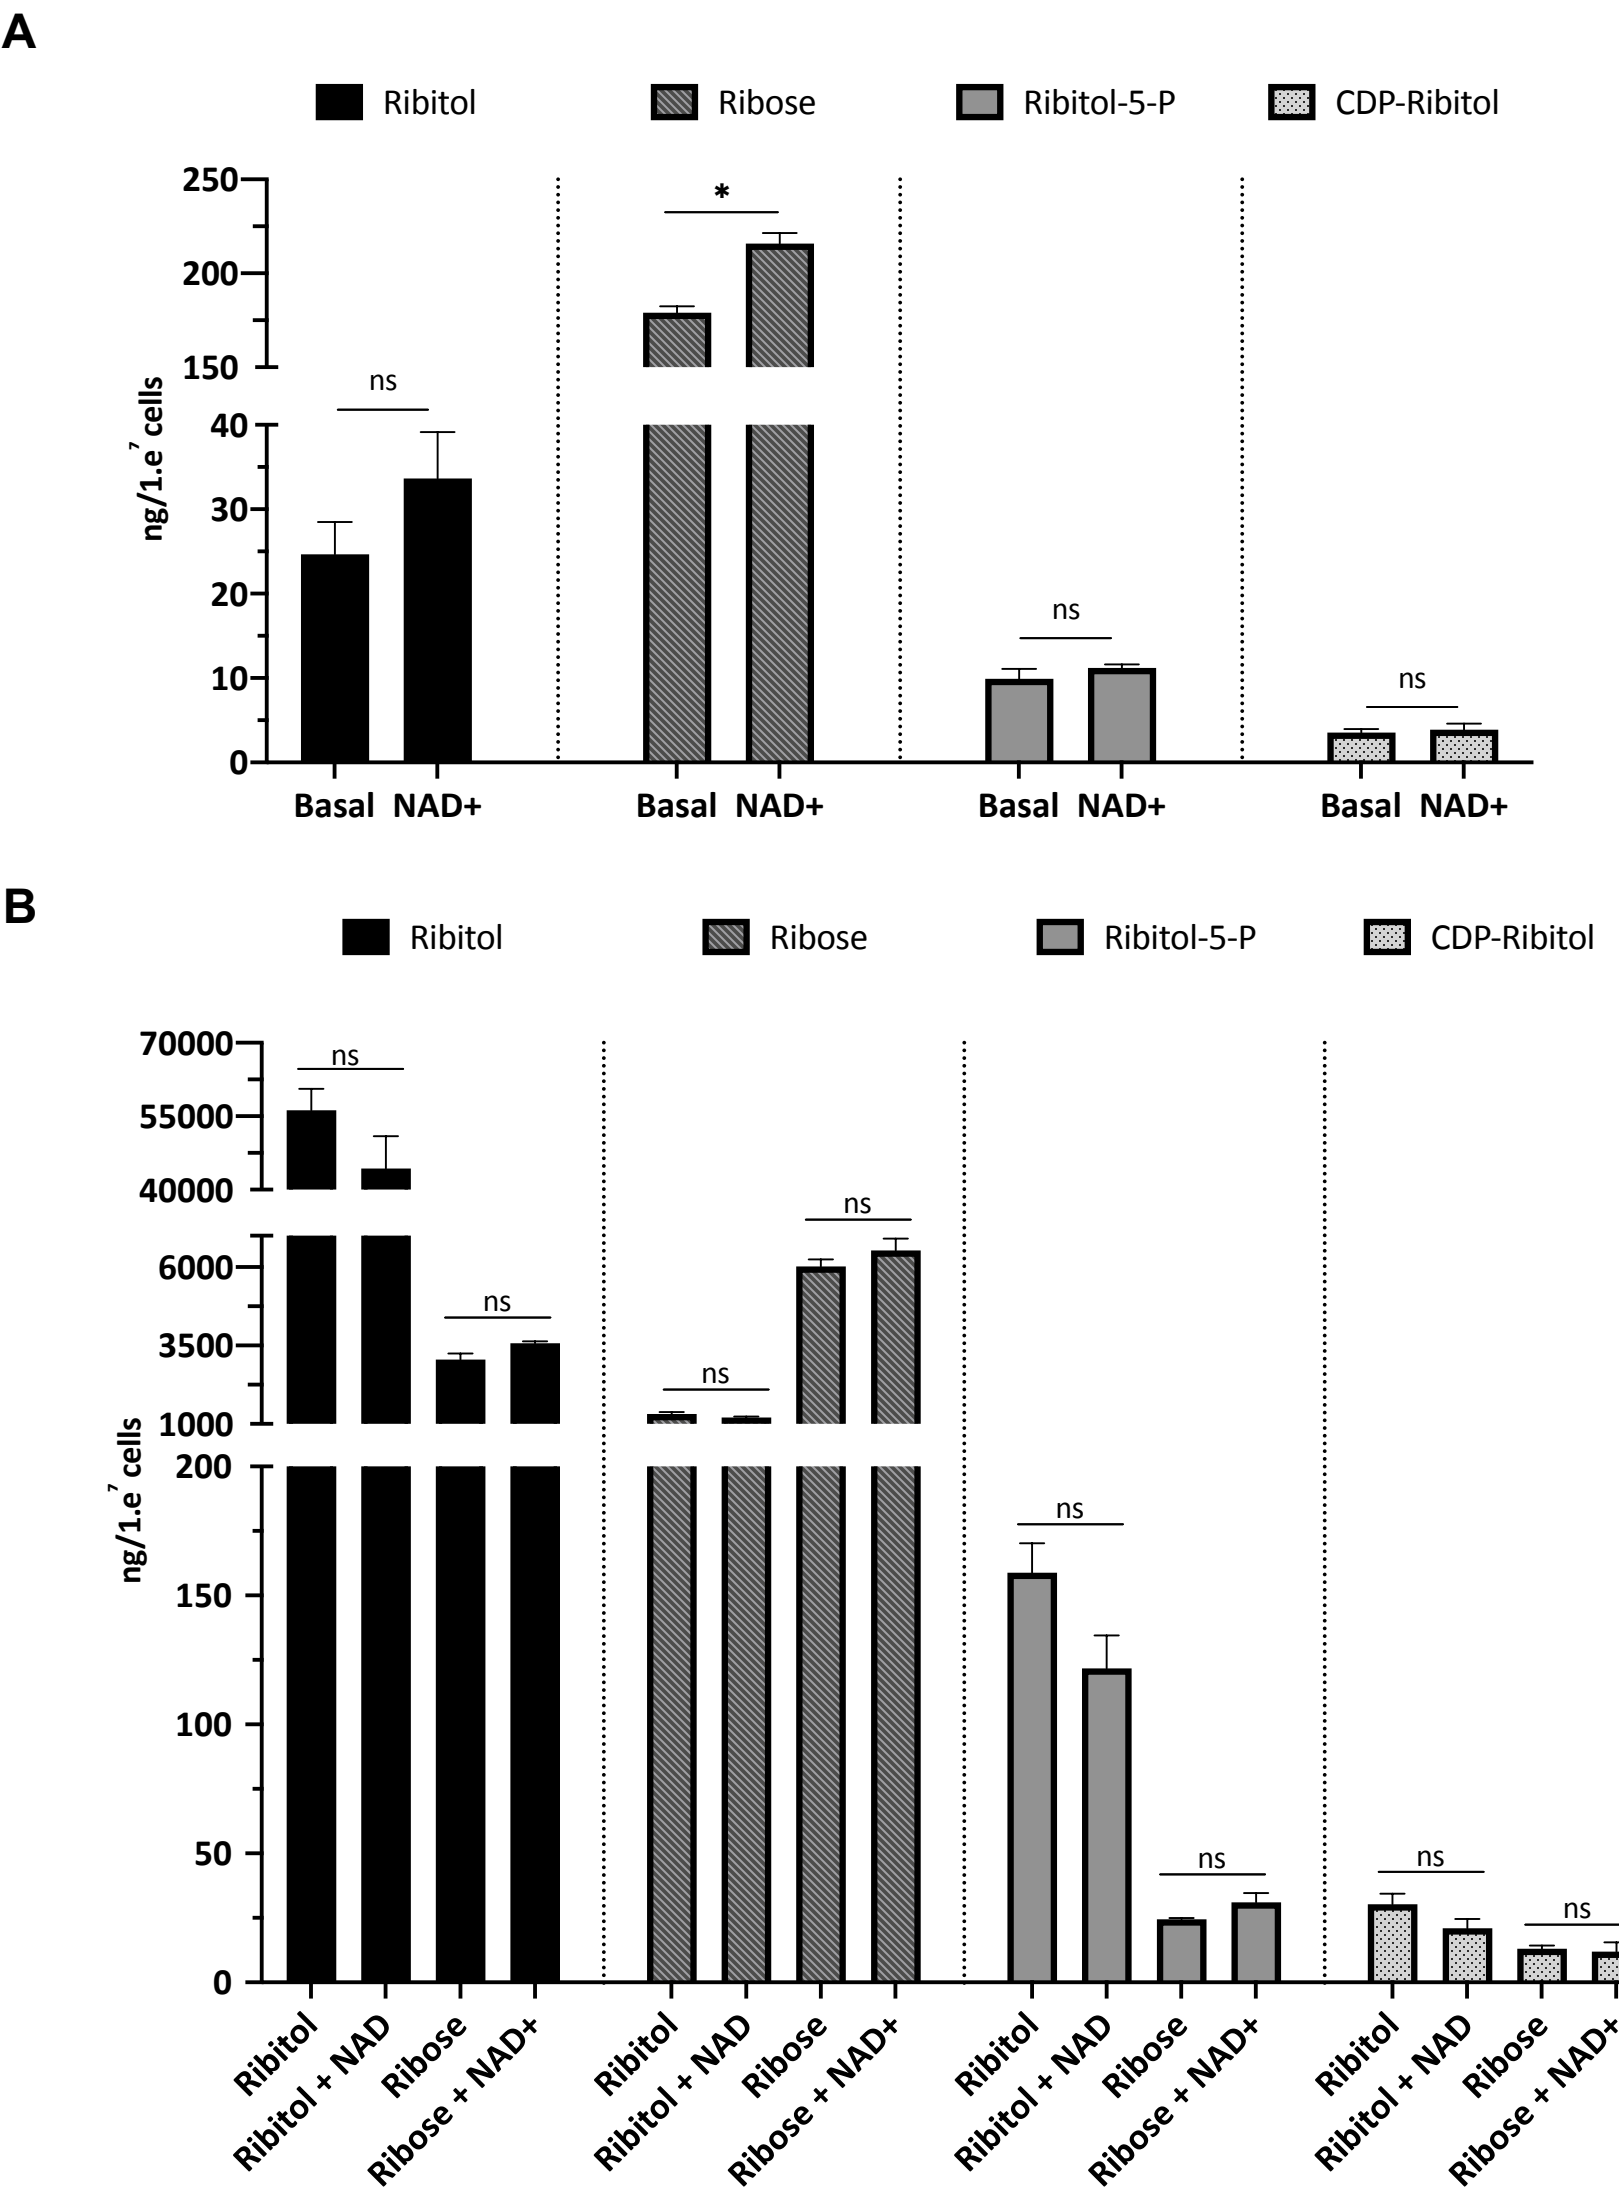

Supplement: supp [file elife_poa_e65443_Figure_4_figure_supplement_2.pdf › elife_poa_e65443_Figure_4_figure_supplement_2.pdf]

Figure 5-figure supplement 1

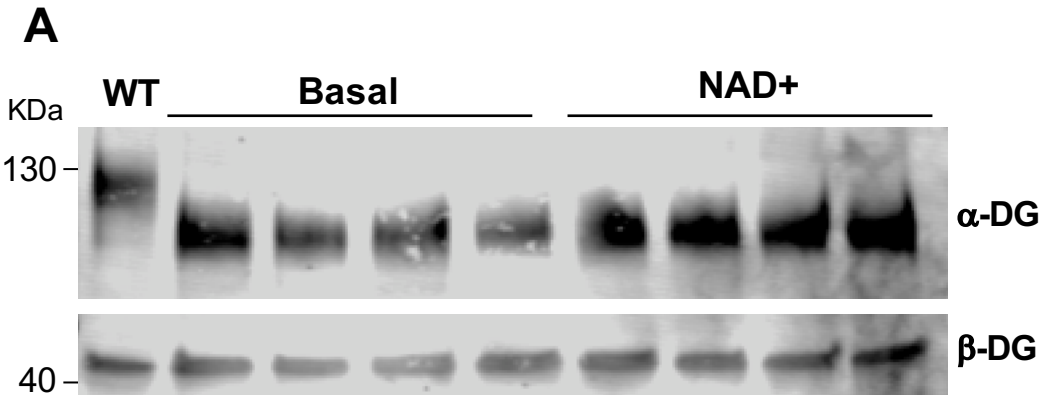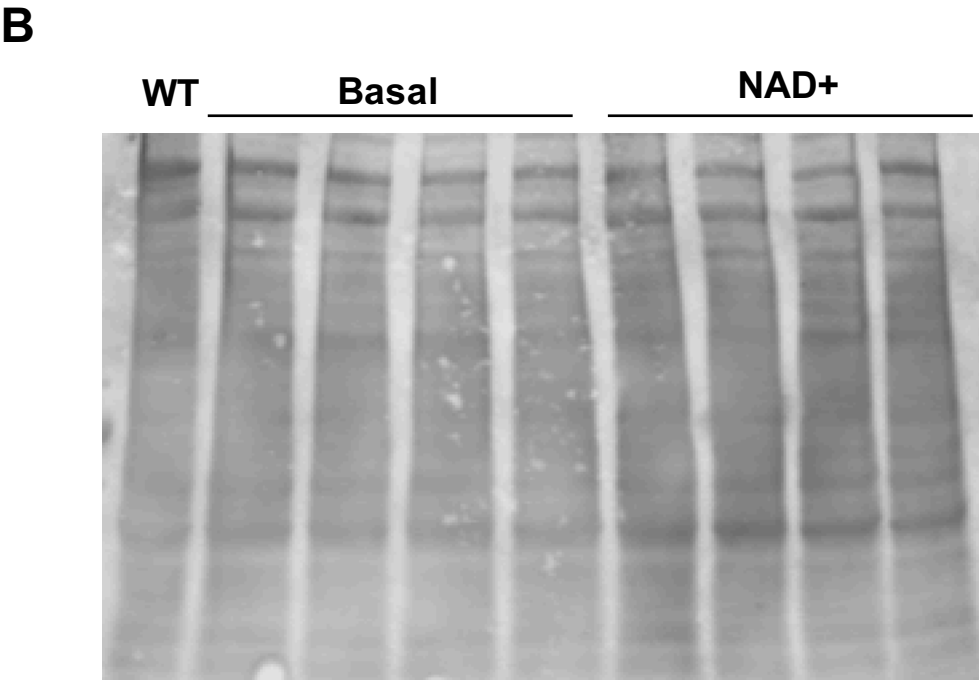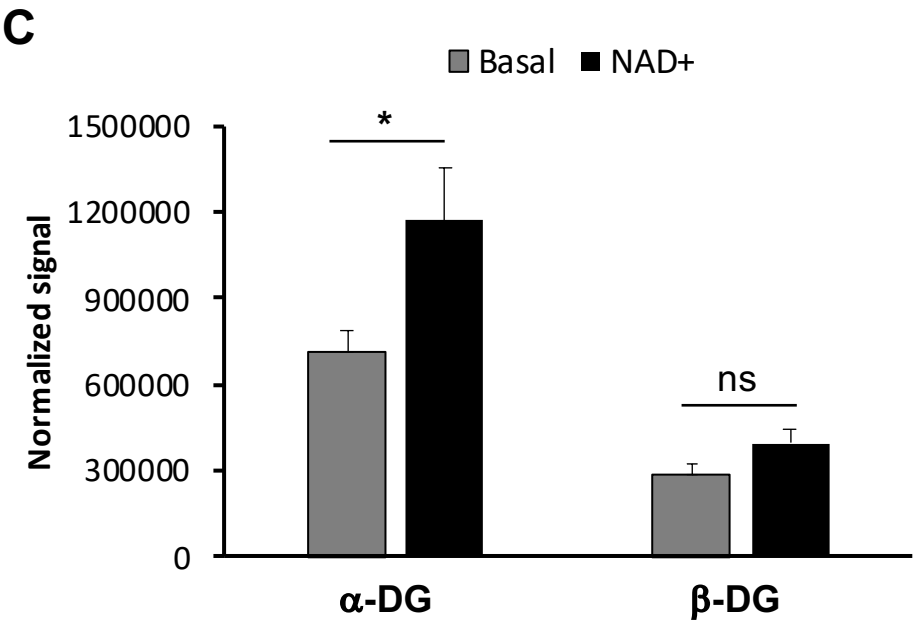

Supplement: supp [file elife_poa_e65443_Figure_5_figure_supplement_1.pdf › elife_poa_e65443_Figure_5_figure_supplement_1.pdf]
